# Supplementary material
Source: PubMed Central journal article supplement (PMC3066587)
Supplement: 10.3163.1536-5050.99.2.009.sg001.pdf [file 10.3163.1536-5050.99.2.009.sg001.pdf]

**A retrospective cohort study of structured abstracts in MEDLINE, 1992–2006**

**Anna M. Ripple, MLS; James G. Mork, MS; Lou S. Knecht, MLS; Betsy L. Humphreys, MLS,  
AHIP, FMLA**

---

**Table 1**  
Select data element comparison of averages of structured-abstract set to entire MEDLINE SET

---

|                                 | <b>Structured-abstract set</b> | <b>Entire MEDLINE set</b> |
|---------------------------------|--------------------------------|---------------------------|
| Record size in bytes            | 2,445.0                        | 1,687.0                   |
| Words in abstract               | 248.8                          | 192.2                     |
| Abstract length (in characters) | 1,644.0                        | 1,263.4                   |
| Article title (in characters)   | 101.3                          | 90.2                      |
| Medical Subject Headings        | 13.8                           | 11.5                      |
| Number of authors               | 5.3                            | 3.9                       |

---
