# Supplementary material
Source: PubMed Central journal article supplement (PMC3066587)
Supplement: 10.3163.1536-5050.99.2.009.sg002.pdf [file 10.3163.1536-5050.99.2.009.sg002.pdf]

**A retrospective cohort study of structured abstracts in MEDLINE, 1992–2006**

**Anna M. Ripple, MLS; James G. Mork, MS; Lou S. Knecht, MLS; Betsy L. Humphreys, MLS,  
AHIP, FMLA**

**Table 2**  
Label variants mapped to metaterm “PROBLEM”

| <b>Term</b>                              | <b>Number of occurrences</b> |
|------------------------------------------|------------------------------|
| PROBLEM                                  | 1,709                        |
| STATEMENT OF PROBLEM                     | 1,011                        |
| STATEMENT OF THE PROBLEM                 | 43                           |
| PROBLEM BEING ADDRESSED                  | 10                           |
| PROBLEMS                                 | 10                           |
| BASIC PROBLEM AND OBJECTIVE              | 9                            |
| PROBLEM ADDRESSED                        | 9                            |
| BASIC PROBLEM AND OBJECTIVE OF STUDY     | 8                            |
| PROBLEM STATEMENT AND BACKGROUND         | 8                            |
| STATEMENT OF PROBLEMS                    | 8                            |
| THE PROBLEM                              | 8                            |
| PROBLEM STATEMENT                        | 7                            |
| PROBLEM AND METHOD OF STUDY              | 4                            |
| PROBLEM AND OBJECTIVE                    | 4                            |
| PROBLEM CONSIDERED                       | 4                            |
| PROBLEM AND METHOD                       | 3                            |
| BASIC PROBLEM                            | 2                            |
| APPROACH TO THE PROBLEM                  | 1                            |
| BASIC PROBLEM AND AIM OF STUDY           | 1                            |
| BASIC PROBLEM AND OBJECTIVE OF THE STUDY | 1                            |
| BASIC PROBLEMS AND OBJECTIVE             | 1                            |
| PROBLEM AND BACKGROUND                   | 1                            |
| PROBLEM AND METHODS                      | 1                            |
| PROBLEM AND PURPOSE                      | 1                            |
| PROBLEM ASSESSED                         | 1                            |
| PROBLEM STATEMENT AND PURPOSE            | 1                            |
| PROBLEMS ADDRESSED                       | 1                            |
| PROBLEMS AND AIMS                        | 1                            |
| STATE OF THE PROBLEM                     | 1                            |
| STATEMENT OF PROBLEM                     | 1                            |

| <b>Term</b>                                  | <b>Number of occurrences</b> |
|----------------------------------------------|------------------------------|
| STATEMENT OF PROBLEM AND RATIONALE           | 1                            |
| STATEMENTS OF THE PROBLEM                    | 1                            |
| Total label occurrences for PROBLEM metaterm | 2,872                        |
